# Supplementary material for: Fabrication of the reduced preoxidized graphene-based nanofiltration membranes with tunable porosity and good performance
Source: Royal Society of Chemistry journal article supplement (doi:10.1039/c6ra24746f), 2017-01-01
Supplement: c6ra24746f1.pdf [file c6ra24746f1.pdf]

Electronic Supplementary Material (ESI) for RSC Advances.  
This journal is © The Royal Society of Chemistry 2016

## Supporting Information

### Fabricating preoxide graphene-based nanofiltration membranes and their good performance with tunable porosity

Yanhong Chang,<sup>\*ab</sup> Yudi Shen,<sup>abc</sup> Debin Kong,<sup>\*c</sup> Jing  
Ning,<sup>c</sup> Zhichang Xiao,<sup>cd</sup> Jiaxu Liang,<sup>cd</sup> and Linjie Zhi<sup>\*c</sup>

<sup>a</sup>Department of Environmental Engineering University of Science and Technology of Beijing,  
Xueyuan Road No.30, Haidian District, Beijing, 100083, P.R. China

<sup>b</sup>Beijing Key Laboratory of Resource-oriented Treatment of Industrial Pollutants, University of  
Science and Technology of Beijing, Xueyuan Road No.30, Haidian District, Beijing, 100083, P. R.  
China

<sup>c</sup>National Center for Nanoscience and Technology, Beiyitiao No.11, Zhongguancun, Beijing,  
100190, P.R. China

<sup>d</sup>University of Chinese Academy of Sciences, Beijing 100039, P.R. China

## **Supporting information list**

### **1. Experimental section**

Preparation of Preoxide Graphene (PG) from Graphene Oxide (GO)

Preparation of Preoxide Graphene Membranes (PGMs) and Reduced PGMs (rPGMs)

Stability performance evaluation for PGMs and rPGMs at high salt concentration and pressure

NF performance evaluation for PGMs and rPGMs

### **2. The vacuum membrane distillation and the stability of the membrane**

### **3. The surface morphology of rPGMs at different reduction**

**time of 40, 60 and 80 min**

### **4. The XRD patterns of PG and rPG**

### **5. The contact angles of PGM and rPGMs**

### **6. Summarize of some GO-based membranes for salt and dye rejection**

### **7. Characterization**

### **8. Notes and References**

## 1. Experimental section

**Preparation of Preoxide Graphene (PG) from Graphene Oxide (GO):** GO was synthesized from natural graphite (300  $\mu\text{m}$ , Qingdao Graphite Company) by a modified Hummers method.<sup>1</sup> Typically,  $\text{H}_2\text{SO}_4$  (300 mL) and natural flake graphite (50 mesh, 10 g) were mixed in a round-bottom flask (1000 mL) cooled with an ice bath, and then magnetically stirring the mixture for 30 min, forming  $\text{KMnO}_4$  (0.15 g) was added gradually and stirred for 30 min before  $\text{KMnO}_4$  (3.0 g) was added to maintain the temperature no more than  $10^\circ\text{C}$ . After 2h magnetically stirring, the beaker was heated at  $35^\circ\text{C}$ , and kept it overnight. Then, distilled water (300 mL) was slowly mixed with the suspension at this temperature and further hydrogen preoxide (30%, 50 mL) was mixed, forming a bright yellow suspension. The solution obtained was repeatedly centrifuged and washed with dilute hydrochloric acid (3%, 100 mL) and distilled water until the pH of the solution became neutral. Finally, the precipitates were diluted in distilled water to make a solution of  $6\text{ mg mL}^{-1}$  concentration for storage. The above aqueous GO suspension (2.5 mL) was diluted to  $1\text{ mg mL}^{-1}$  by DI water and added into concentrated  $\text{HNO}_3$  (70%, 375 mL) in a sealed flask vial continuous stirring. Based on the previous attempts, a GO suspension/70%  $\text{HNO}_3$  volume ratio of 1:12.5 were added into the system and refluxed for 18h with constant stirring. After that, the mixture was sonicated for 4h, 6h, 9h and settled at room temperature staying overnight. Further, wash the compound and repeat the centrifugation procedure several times to remove the acid in order to obtain the PG.

**Preparation of Preoxide Graphene Membranes (PGMs) and Reduced PGMs (rPGMs):** First of all, the obtained PG solution with micropores and the GO suspension were diluted to  $1\text{ mg mL}^{-1}$  and then coated on the commercialized micro-filtration membranes through a rod coating method.<sup>2</sup> It only needed solution of 250  $\mu\text{L}$  every time and repeating the coating step three times. After that, stewing 12 hours for drying the films naturally and finally the PGMs could be acquired. Before the reduction of PG solution by hydrogen, a calculated amount of  $\text{PdCl}_2$  aqueous solution (Pd content:  $6\text{ g L}^{-1}$ ) was added into the PG dispersion (30 mg, weight ratio of Pd to PG is 0.1). The rPGMs were executed in a hydrogen generator (300 mL) at room temperature. After a certain time (20 min, 40 min, 60 min, 80 min, 100 min), a range of the resulting reduction preoxide graphene membranes at different times can be obtained. The reduced samples are labeled rPGM-20, rPGM-40, rPGM-60, rPGM-80, rPGM-100.

**Stability performance evaluation for PGMs and rPGMs at high salt concentration and pressure:** The stability of PGMs and rPGMs are investigated through vacuum membrane distillation by using a laboratory setup. The effective membrane area was  $15.00\text{ cm}^2$ . Sodium chloride solution ranging from 0.05 to  $4\text{ mol L}^{-1}$  was pumped to the feed side of the membrane by a digital peristaltic pump (WT600-2J, Baoding Longer Co., Ltd., China) at a constant flow rate of  $1.0\text{ L min}^{-1}$ .

***NF performance evaluation for PGMs and rPGMs:*** All the NF performance evaluation was carried out in a filtration device. The pure water flux  $F$  ( $\text{L m}^{-2} \text{h}^{-1} \text{bar}^{-1}$ ) was recorded after 1h of filtration when it went steady at 1 bar and neutral pH. After the salt or dye solution was switched, the permeate flux was determined when the retention rate became stable. Retentate ( $C_r$ ) and permeate concentrations ( $C_p$ ) were recorded both during and at the end of each run to monitor the evolution of rejection rate. The rejection rate can be calculated by the following equation:

$$R = \frac{C_r - C_p}{C_r} \times 100\%$$

The rejection rate of different salts was measured by the sequence of  $\text{Na}_2\text{SO}_4$ ,  $\text{MgSO}_4$ ,  $\text{NaCl}$  and  $\text{MgCl}_2$  at the concentration of 0.005 M. The capabilities of separating organic dyes from water were test applying Methyl Orange. First, the rejection rate for  $\text{Na}_2\text{SO}_4$  of a new membrane sample was tested to make sure the membrane is of proper quality. Moreover, the membrane surface was exposed to dye and salts solution (25 mL) for more than 8 h to rule out the adsorption effect by the membrane. Finally, the rejection rate for dye solution and salts solution were measured by UV-vis spectra and by electrical conductivity by collecting permeated samples. For each group of samples, the tests for NF performance were performed in triplicate to ensure reproducibility.

## 2. The vacuum membrane distillation and the stability of the membrane

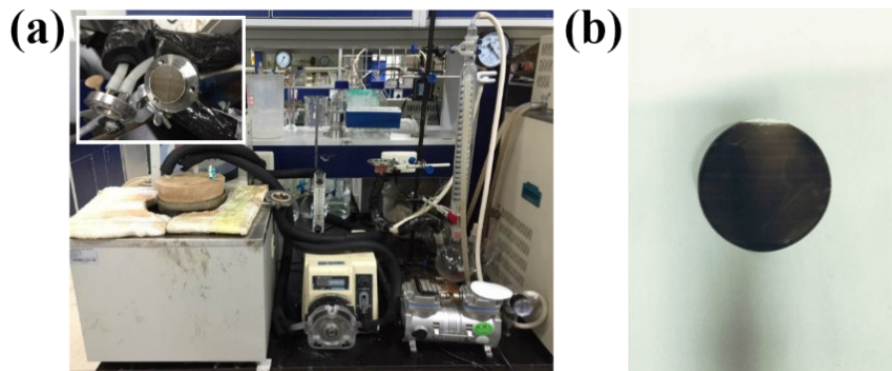

**Fig. S1.** (a) Optical photograph of the vacuum membrane distillation (VMD) experimental system, the inset is the membrane; (b) Optical photograph of the rPGM membrane after VMD at a salt concentration of  $4 \text{ mol L}^{-1}$  with the pressure of 2 bar.

### 3. The surface morphology rPGMs at different reduction time of 40, 60 and 80 min

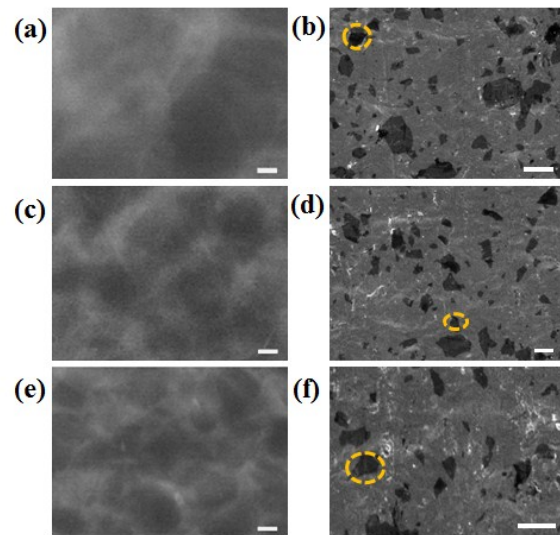

**Fig. S2.** The surface morphology of the (a-b) rPGM-40, (c-d) rPGM-60, (e-f) rPGM-80. Scale bars, (a), (c), (e) 100nm, (b), (d), (f) 1 $\mu$ m.

#### 4. The XRD patterns of PG and rPG

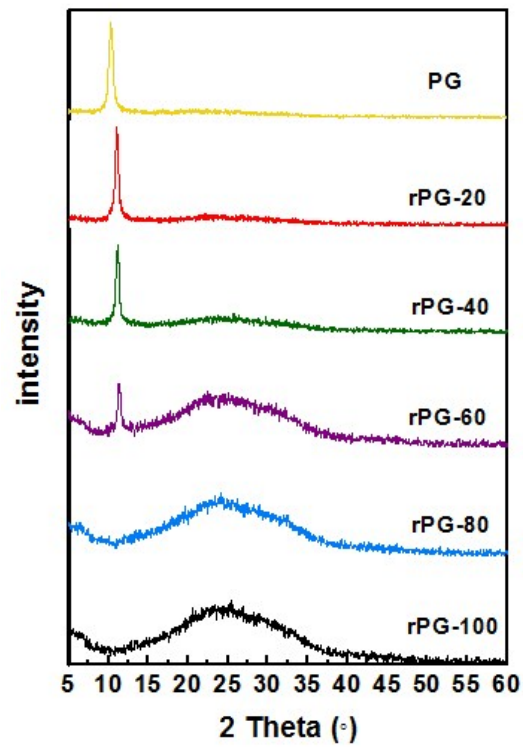

**Fig. S3.** XRD patterns of PG, rPG-20, rPG-40, rPG-60, rPG-80, rPG-100.

## 5. The contact angles of PGM and rPGMs

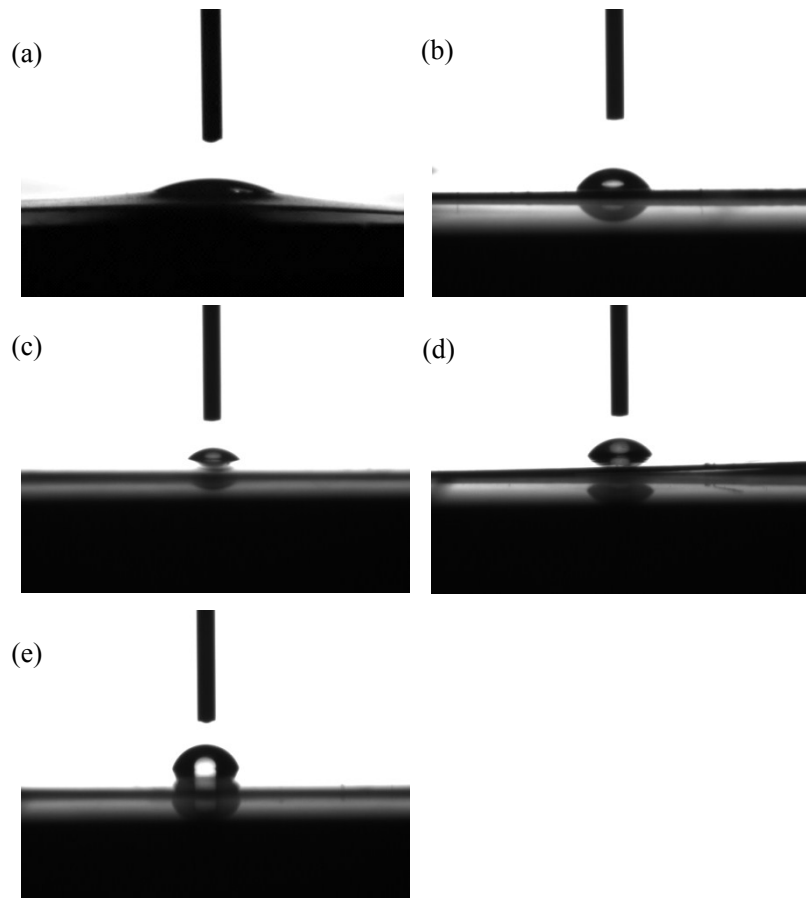

**Fig. S4.** Digital photos of water drops on (a) PG membrane, (b) rPG-20 membrane, (c) rPG-40 membrane, (d) rPG-60 membrane, (e) rPG-80 membrane, and the water contact angles are  $11.9^\circ$  ,  $45.3^\circ$  ,  $85.8^\circ$  ,  $101.3^\circ$  and  $121.2^\circ$  .



## 6. Summarize of some GO-based membranes for salt and dye rejection

**Table S1.** Summarize of some GO-based membranes for salt and dye rejection.

| Sample description       | Cited literature | Conditions                                          | NaCl (R%)             | Na <sub>2</sub> SO <sub>4</sub> (R%) | Dye (R%)             |
|--------------------------|------------------|-----------------------------------------------------|-----------------------|--------------------------------------|----------------------|
| <b>rPGM-80</b>           | Our work         | 1 bar, 5 mM (salt)<br>0.025 g L <sup>-1</sup> (dye) | 53.9                  | 69.0                                 | 97.5<br><b>(MO)</b>  |
| <b>G-CNTm(8:1)</b>       | ref 3            | 5 bar, 10mM (salt)<br>0.05g L <sup>-1</sup> (dye)   | 39.6                  | 71.2                                 | 92.0<br><b>(MO)</b>  |
| <b>uGNMs</b>             | ref 4            | 5 bar, 20 mM (salt)<br>0.02mM (dye)                 | ~ 40                  | ~ 60                                 | 99.8<br><b>(MB)</b>  |
| <b>GO/TMC</b>            | ref 5            | 3.4bar, 10mM (salt)<br>7.5mg L <sup>-1</sup> (dye)  | 29                    | 26                                   | 46-66<br><b>(MB)</b> |
| <b>GO/PECs</b>           | ref 6            | 5 bar                                               | Na <sup>+</sup> :43.2 | Na <sup>+</sup> :43.2                | 87.6<br><b>(MO)</b>  |
| <b>PSF/GO (1000 ppm)</b> | ref 7            | 4 bar                                               | ~ 50                  | ~ 65                                 |                      |
| <b>NSC-GO membrane</b>   | ref 8            | 13 bar, 15μM (EB)                                   |                       |                                      | 83<br><b>(EB)</b>    |
| <b>0.5 wt% GO/PES</b>    | ref 9            | 4 bar, 30 mg L <sup>-1</sup>                        |                       |                                      | 96<br><b>(DR16)</b>  |

MO: Methyl Orange; MB: Methylene Blue; EB: Evans Blue; DR: Direct Red

## **7. Characterization**

The morphology and thickness of as-prepared PGM and rPGMs were investigated using Hitachi S4800 scanning electron microscopy (SEM) and JEOL 2100F transmission electron microscopy (TEM). Besides, the detailed functional group information was obtained by X-ray Photoelectron Spectroscopy (XPS, ESCALAB250Xi); the X-ray diffraction (XRD) measurements involve the interlayer spacing were carried out on a RigakuD/max-2500B2 + /PCX system with Cu Ka radiation. Contact angle measurement was taken using a VCP Optima XE system. The pure water flux and retention measurements were performed on a dead end filtration device. UV–vis spectra were obtained to determine the concentrations of dye solutions on a Varian Cary 300 Bio UV–vis spectrophotometer. Salt concentrations were measured using electrical conductivity (DDS-307, Shanghai Leici Instrument Co.).

## 8. Notes and References

1. M. Liang, J. Wang, B. Luo, T. Qiu and L. Zhi, *Small*, 2012, **8**, 1180-1184, 1124.
2. J. Ning, J. Wang, X. Li, T. Qiu, B. Luo, L. Hao, M. Liang, B. Wang and L. Zhi, *Journal of Materials Chemistry A*, 2014, **2**, 10969.
3. Y. Han, Y. Jiang and C. Gao, *ACS Appl Mater Interfaces*, 2015, **7**, 8147-8155.
4. Y. Han, Z. Xu and C. Gao, *Advanced Functional Materials*, 2013, **23**, 3693-3700.
5. M. Hu and B. Mi, *Environmental Science & Technology*, 2013, **47**, 3715-3723.
6. N. Wang, S. Ji, G. Zhang, J. Li and L. Wang, *Chemical Engineering Journal*, 2012, **213**, 318-329.
7. B. M. Ganesh, A. M. Isloor and A. F. Ismail, *Desalination*, 2013, **313**, 199-207.
8. H. Huang, Z. Song, N. Wei, L. Shi, Y. Mao, Y. Ying, L. Sun, Z. Xu and X. Peng, *Nat Commun*, 2013, **4**.
9. S. Zinadini, A. A. Zinatizadeh, M. Rahimi, V. Vatanpour and H. Zangeneh, *Journal of Membrane Science*, 2014, **453**, 292-301.
